# Supplementary material
Source: PubMed Central journal article supplement (PMC8626061)
Supplement: NIHMS1757824-supplement-1.pdf [file NIHMS1757824-supplement-1.pdf]

## Supplemental Figure Legends

**Figure S1.** The PatA analogue, DMPatA, is a potent inducer of eIF4A1:poly (AG)<sub>8</sub> RNA clamping, *Related to Figure 1.* **a. Left panel:** Polarization values obtained with wt eIF4A1 (10 μM) in the presence of DMPatA (2.5 μM) or CR-1-31-B (10 μM) and FAM-labeled RNA (10 nM). Reactions were assembled in binding buffer (14.4 mM HEPES-NaOH [pH 8], 108 mM NaCl, 14.4% glycerol, 0.1% DMSO, 2 mM DTT) in the presence or absence of 1 mM MgCl<sub>2</sub>/1mM ATP. n=4 ± SEM. P values were calculated using one-way ANOVA. **Right panel:** Results of filter binding assay obtained with wt eIF4A1 (2.5 μM) in the absence or presence of 1 mM MgCl<sub>2</sub>/1mM ATP and DMPatA (2.5 μM) or CR-1-31-B (10 μM). Radioactive [<sup>32</sup>P]-poly(AG)<sub>8</sub> RNA (100,000 cpm) was used as input. n=3 ± SEM. P values were calculated using one-way ANOVA. **b.** ATPase activity of pre-clamped eIF4A1:RNA:DMPatA complexes. eIF4A1, poly (AG)<sub>8</sub> RNA, 0.5 mM cold ATP with or without DMPatA (2.5 μM) were pre-incubated at RT for 30 min, after which 1 μCi γ-<sup>32</sup>P-ATP (3000 Ci/mmol) was added and ATP hydrolysis monitored for 120 mins. n=3± SEM.

**Figure S2.** Superpositions of the eIF4A structure determined herein with those of eIF4A1:RocA (PDB 5ZC9) and the Drosophila DEAD box helicase, Vasa (PDB 2DB3), *Related to Figure 2.* **a.** The similarity to Vasa indicates that DMPatA and RocA are likely binding to the pre-existing closed conformation induced by binding of RNA and AMP-PNP. Root mean squared deviations (r.m.s.d) derived from the number of corresponding Cα atoms in parentheses are indicated. **b, c** Simulated annealing Fo-Fc omit maps for **(a)** RNA and **(b)** DMPatA contoured at 2.5σ. An annealing temperature of 2500K was used.

**Figure S3.** Comparison of interactions between eIF4A1 and DMPatA or RocA, *Related to Figure 2.* **a.** Ligplot schematic diagram showing DMPatA and RocA contacts to eIF4A1. **b.** RocA-eIF4A1 and RocA-RNA interactions as defined by Iwasaki et al. (2019) and based on PDB 5ZC9.

**Figure S4.** RNA binding of eIF4A1 mutants with substitutions at DMPatA interacting amino acids, *Related to Figure 4.* **a.** Coomassie-stained polyacrylamide gel of the protein preparations used in this study. **b.** Polarization values obtained with the indicated proteins when incubated with FAM-labelled (AG)<sub>8</sub> RNA and ATP. n=3 ± SEM. **c.** Polarization values obtained with wt eIF4A1 and D198K with FAM-poly (AG)<sub>8</sub> RNA in the presence of either DMPatA (2.5 μM) or CR-1-31-B (10 μM). n=5 ± SEM. P values were calculated using two-way ANOVA. **d.** Polarization values obtained with wt eIF4A1, R282K, and D305A mutants with FAM- labelled (AG)<sub>8</sub> RNA in the presence of DMPatA (2.5 μM). n=5 ± SEM.

**Figure S5.** Schematic diagram illustrating construction and validation of *EIF4A2* and *EIF4A1*<sup>F163L</sup>. *EIF4A2* eHAP1 cells, *Related to Figure 4.* **a.** The sequence within *EIF4A2* exon 5 targeted by the indicated sgRNA (bold) is shown. The PAM is shaded orange and the resulting nucleotide change within *EIF4A2* identified in a clonal isolate consisted of a 2 base pair insertion, resulting in early termination of translation (amino acid changes are indicated in blue and \* denotes the location of the stop codon). For *EIF4A1*<sup>F163L</sup> engineering, the targeted codon is highlighted by a dashed orange box and the engineered change in the donor ssODN is indicated in green. A clonal isolate was expanded and the presence of the F163L mutation confirmed by Sanger sequencing of a PCR product obtained from amplifying exon 5. Shown are Western blots of protein extracts isolated from the indicated cells assessing eIF4A1 and eIF4A2 levels. **b.** Cytotoxicity of CR-1-31-B towards wt (blue circles), *EIF4A2* (orange squares), and *EIF4A1*<sup>F163L</sup>*EIF4A2* (green triangles) eHAP1 cells. Cell were exposed to the

indicated concentrations for 2 days and viability was measured using the SRB assay. The  $IC_{50}$ 's of CR-1-31-B towards the test cell lines were: CR-1-31-B/eHAP,  $0.3 \pm 0.07$  nM; CR-1-31-B/*EIF4A2*,  $0.37 \pm 0.08$  nM; CR-1-31-B /*EIF4A1<sup>F163L</sup>EIF4A2*,  $>115$  nM;  $n = 3 \pm$  SEM.

**a**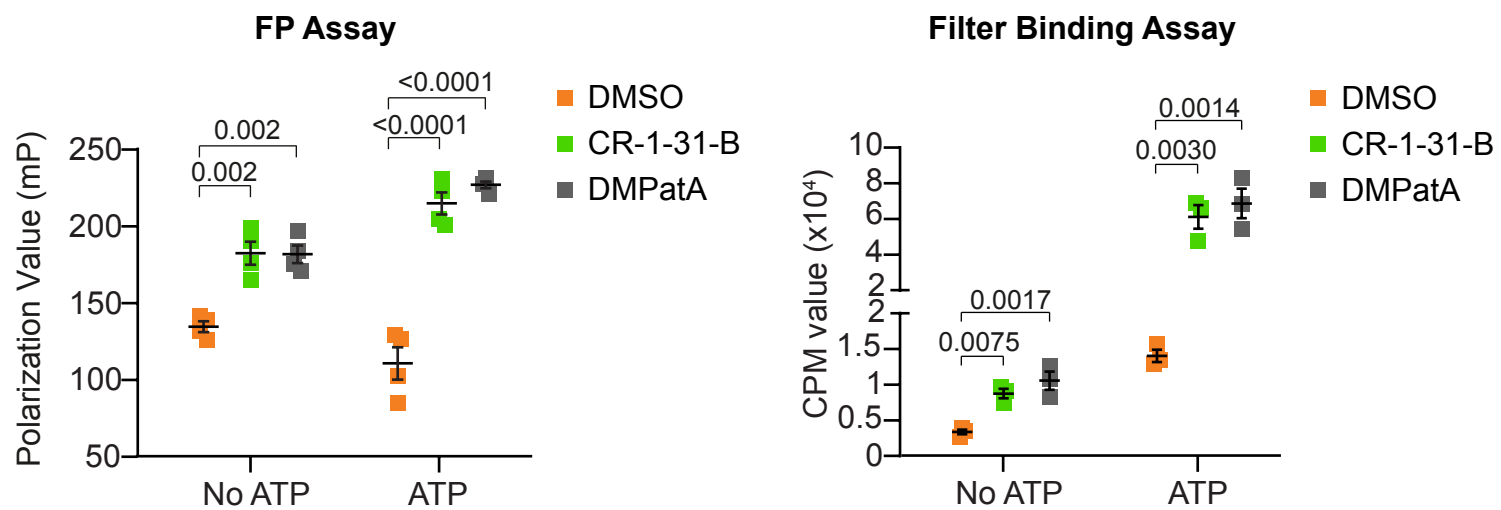**b**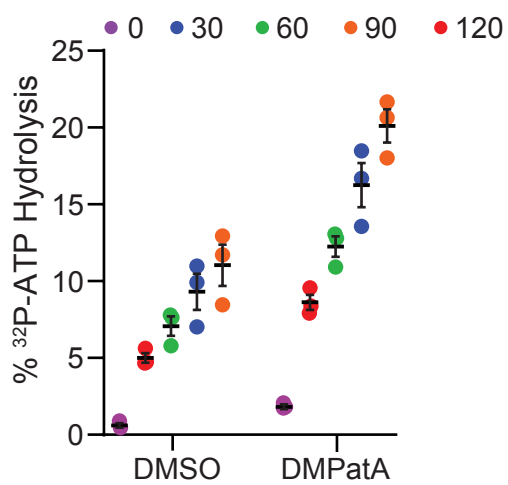**Figure S1**

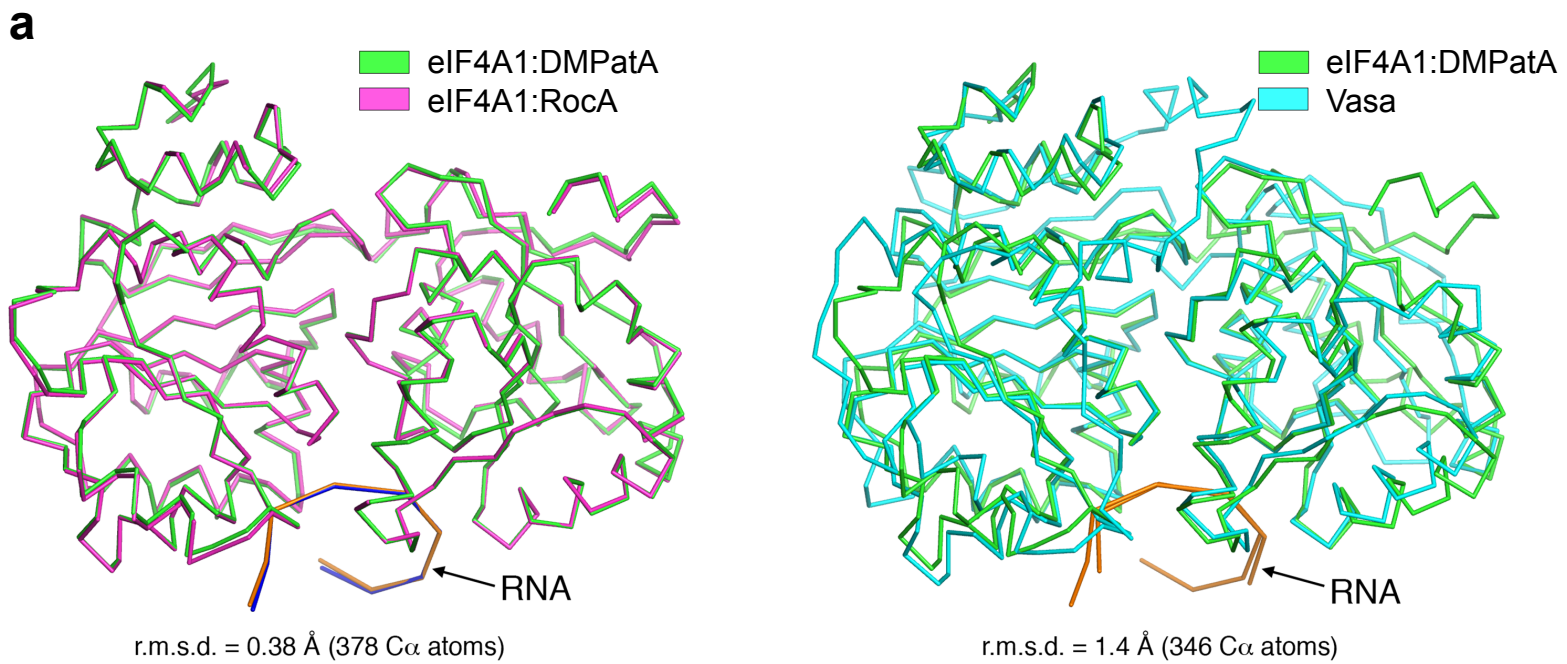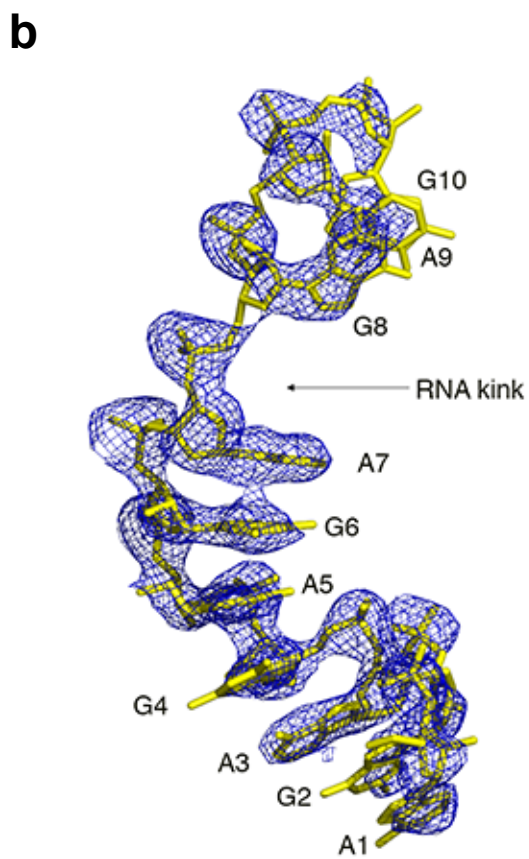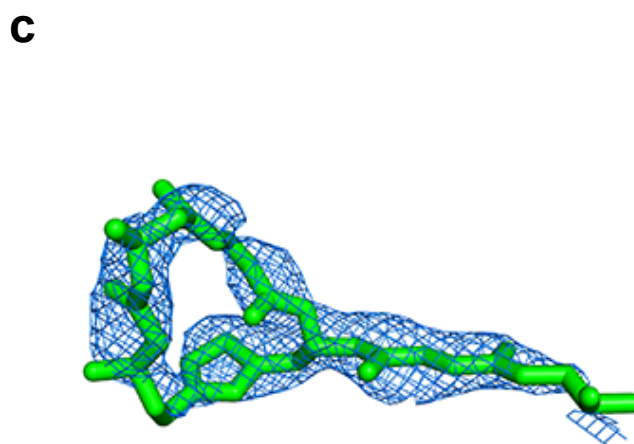

**Figure S2**

**a**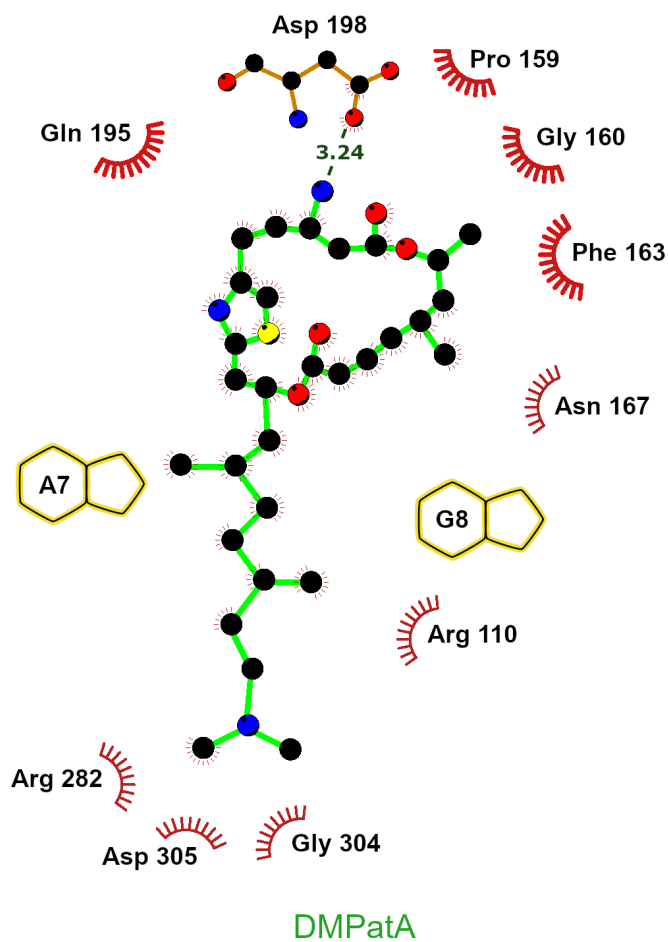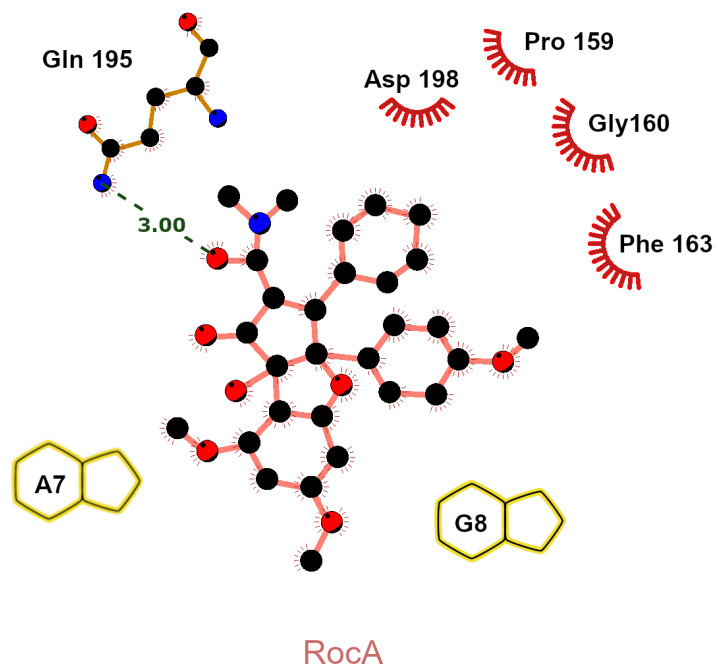**b**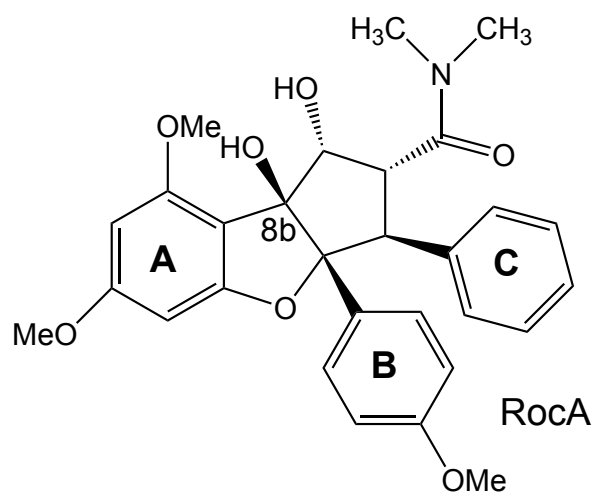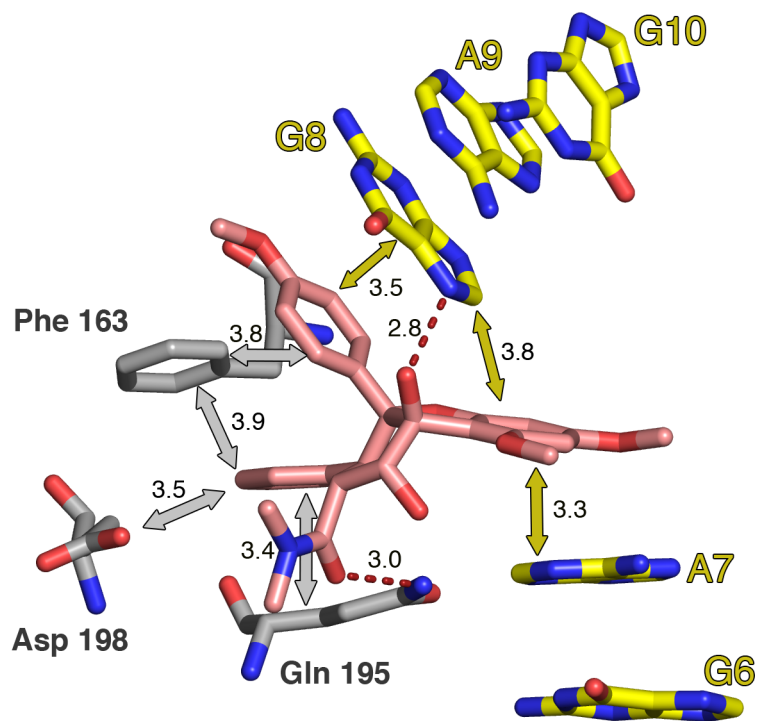**Figure S3**

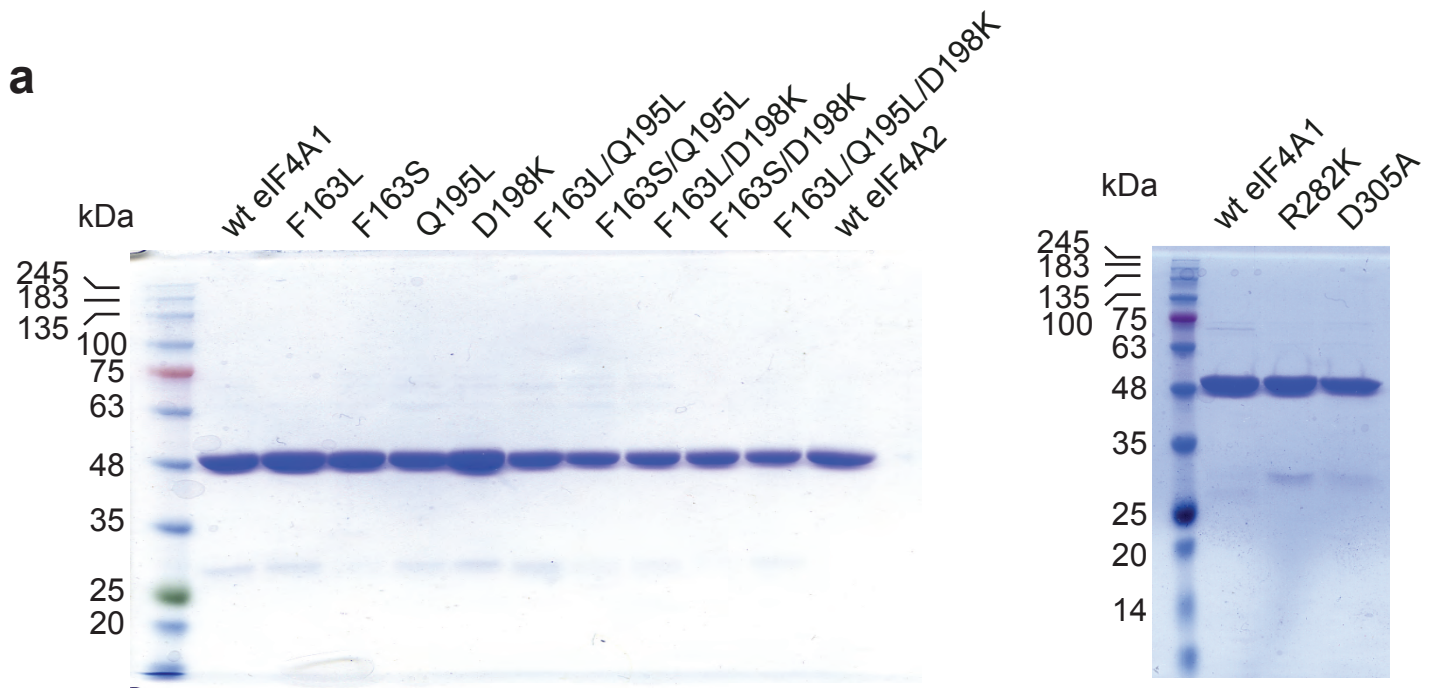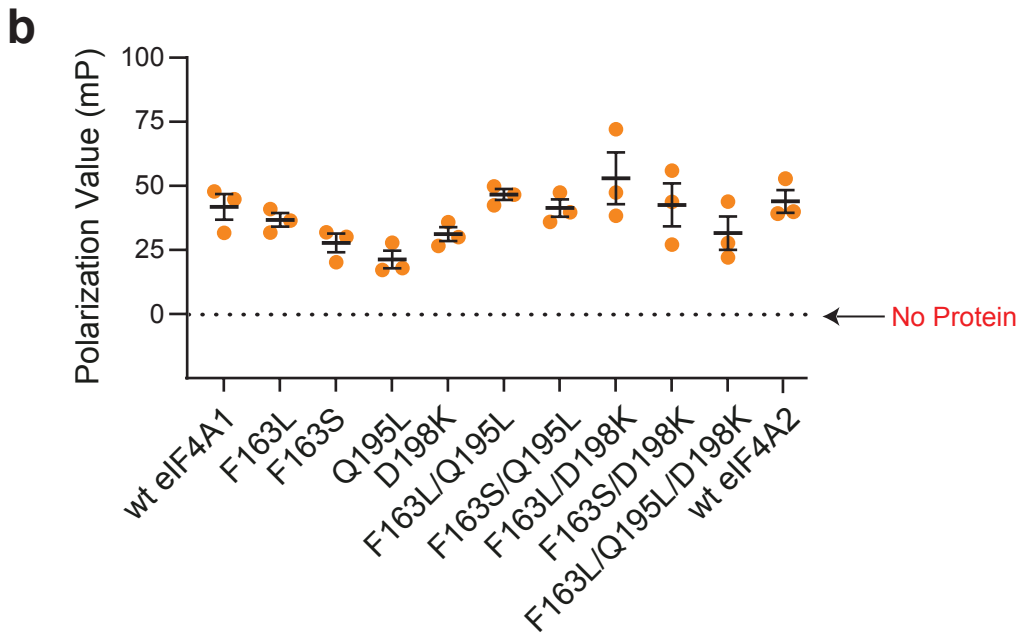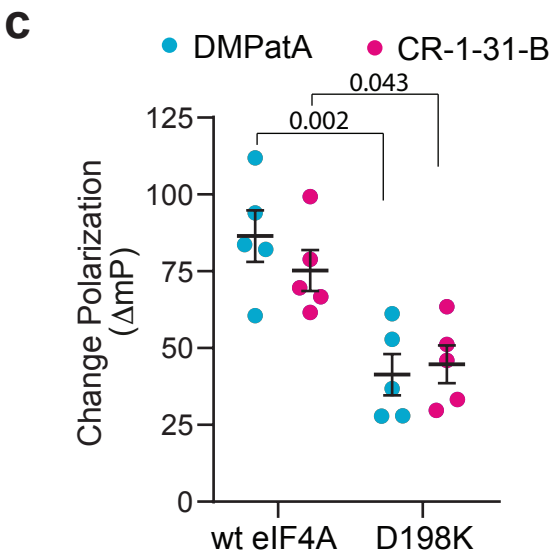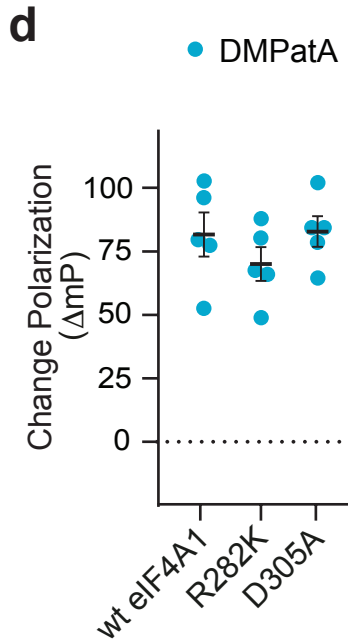

**Figure S4**

**a**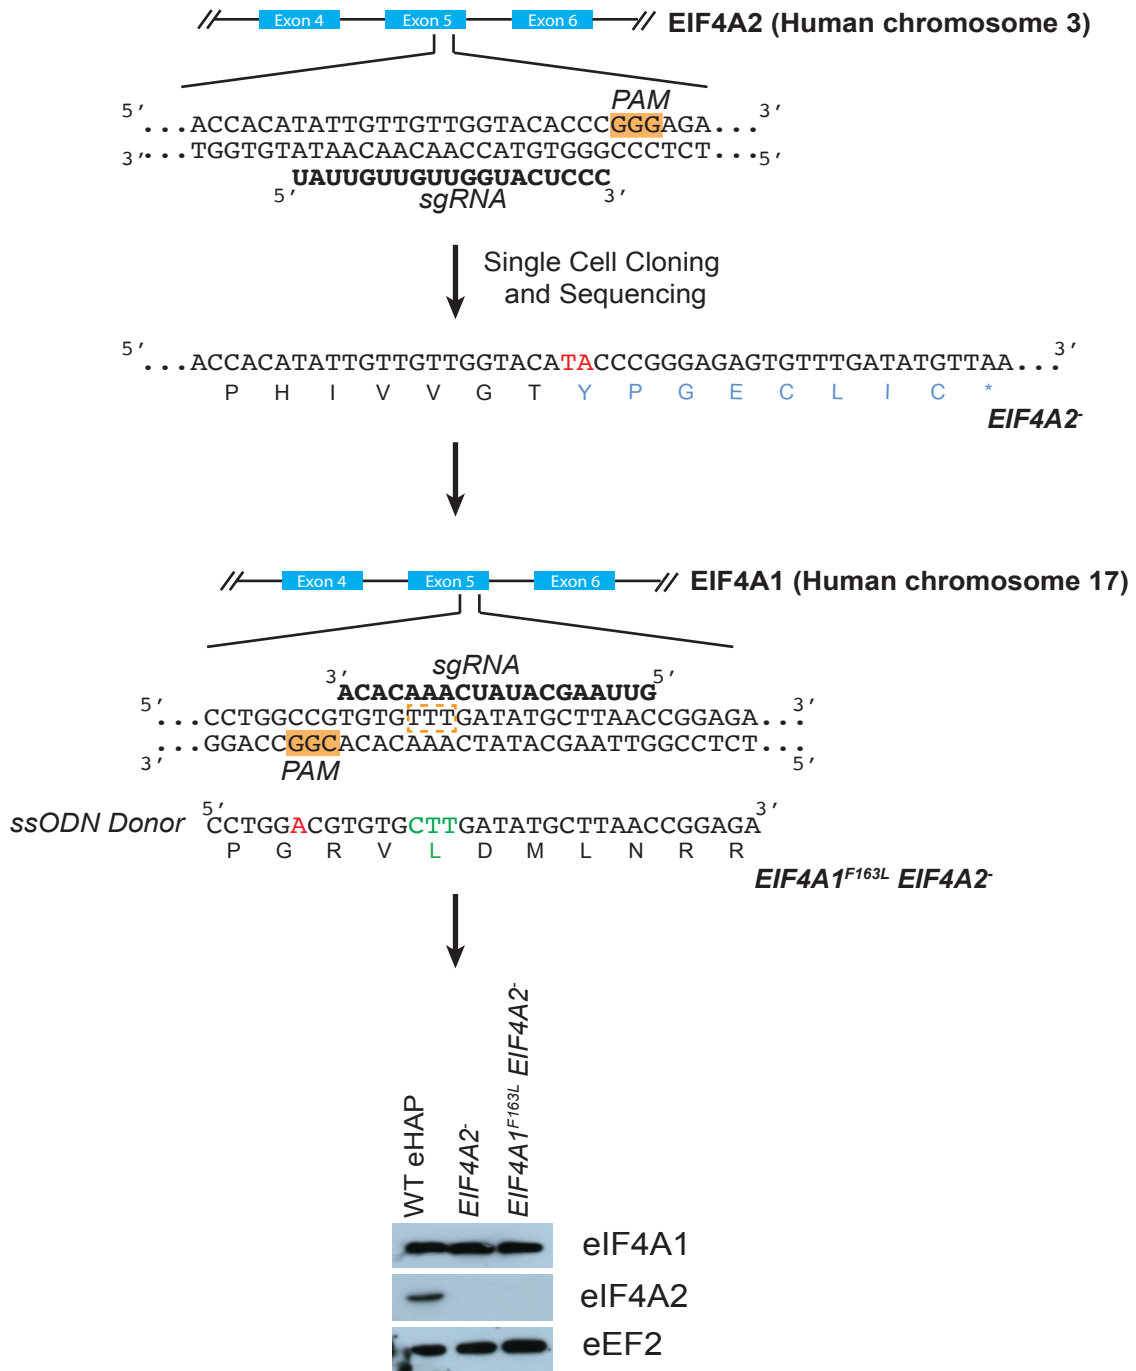**b**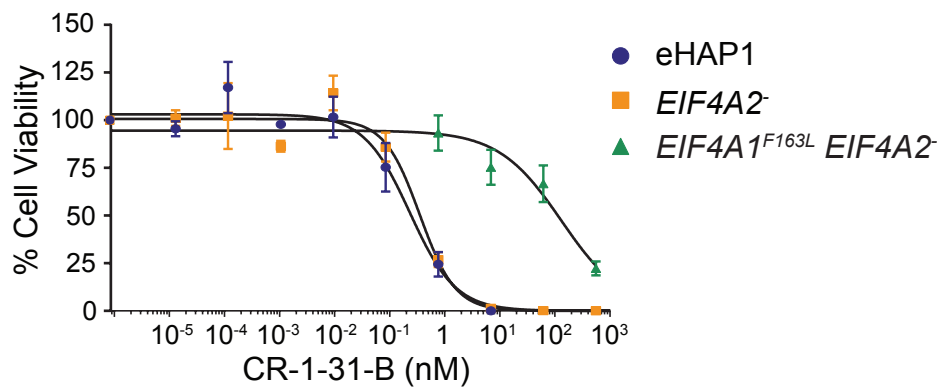**Figure S5**
